# Supplementary material for: All-Climate Aluminum-Ion Batteries Based on Binder-Free MOF-Derived FeS2@C/CNT Cathode
Source: PubMed Central journal article supplement (PMC8302704; doi:10.1007/s40820-021-00682-8), 2021-07-23
Supplement: 40820_2021_682_MOESM1_ESM.pdf [file 40820_2021_682_MOESM1_ESM.pdf]

Supporting Information for

## **All-Climate Aluminum-Ion Batteries Based on Binder-Free**

### **MOF-Derived FeS<sub>2</sub>@C/CNT Cathode**

Yuxiang Hu<sup>1</sup>, Hongjiao Huang<sup>2</sup>, Deshuang Yu<sup>2</sup>, Xinyi Wang<sup>1</sup>, Linlin Li<sup>2</sup>, Han Hu<sup>3</sup>, Xiaobo Zhu<sup>1</sup>, Shengjie Peng<sup>2, \*</sup>, Lianzhou Wang<sup>1, \*</sup>

<sup>1</sup> Nanomaterials Centre, School of Chemical Engineering and Australian Institute for Bioengineering and Nanotechnology, The University of Queensland, QLD 4072, Australia

<sup>2</sup> Jiangsu Key Laboratory of Electrochemical Energy Storage Technologies, College of Materials Science and Technology, Nanjing University of Aeronautics and Astronautics, Nanjing, 211106 P. R. China

<sup>3</sup> State Key Laboratory of Heavy Oil Processing, College of Chemical Engineering, P. R. China University of Petroleum (East China), Qingdao 266580, P. R. China

\*Corresponding authors. E-mail: [l.wang@uq.edu.au](mailto:l.wang@uq.edu.au) (Lianzhou Wang); [pengshengjie@nuaa.edu.cn](mailto:pengshengjie@nuaa.edu.cn) (Shengjie Peng)

### **Supplementary Figures and Tables**

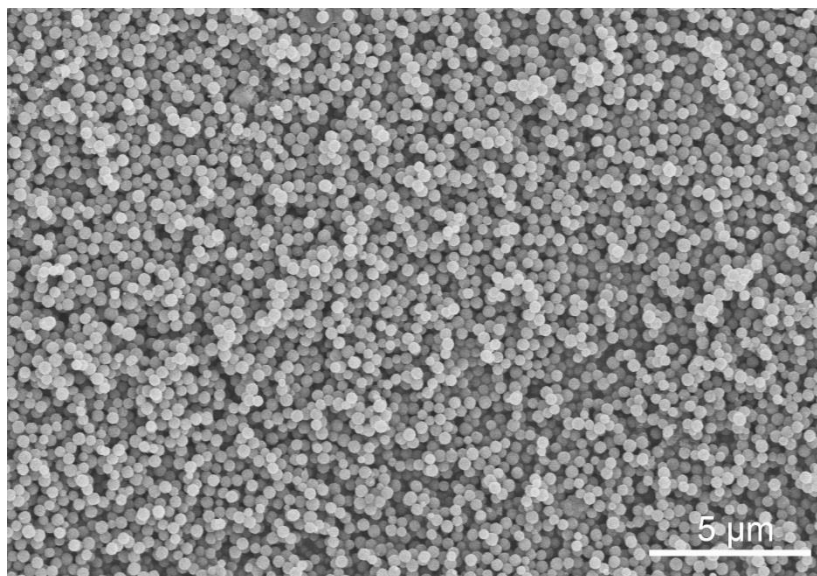

**Fig. S1** SEM image of Fe-MOF on a large scale

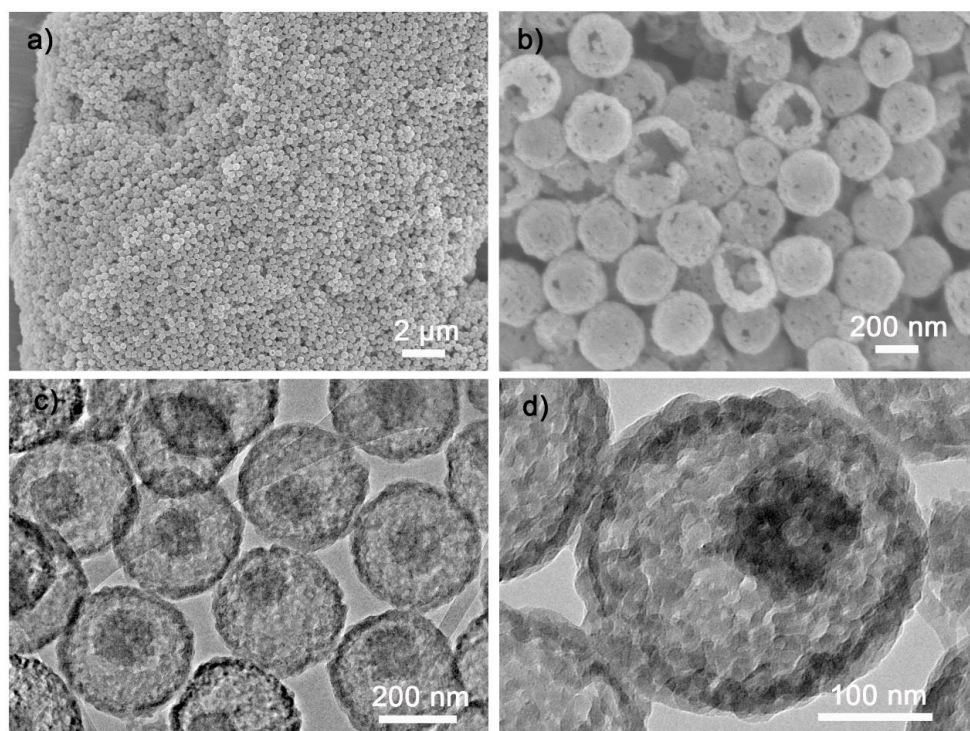

**Fig. S2** a), b) SEM and c), d) TEM images of the etched Fe-MOF with yolk-shell structure

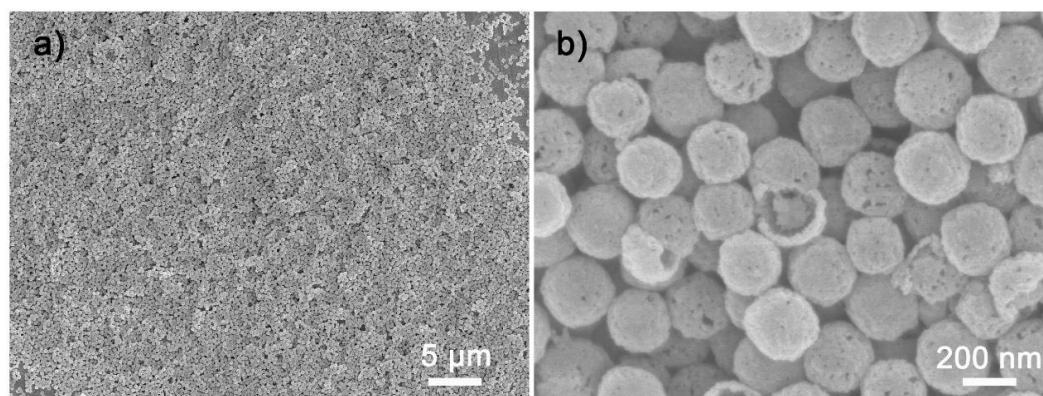

**Fig. S3** SEM image of Fe-MOF after etching by acid at 140 °C for 2 h

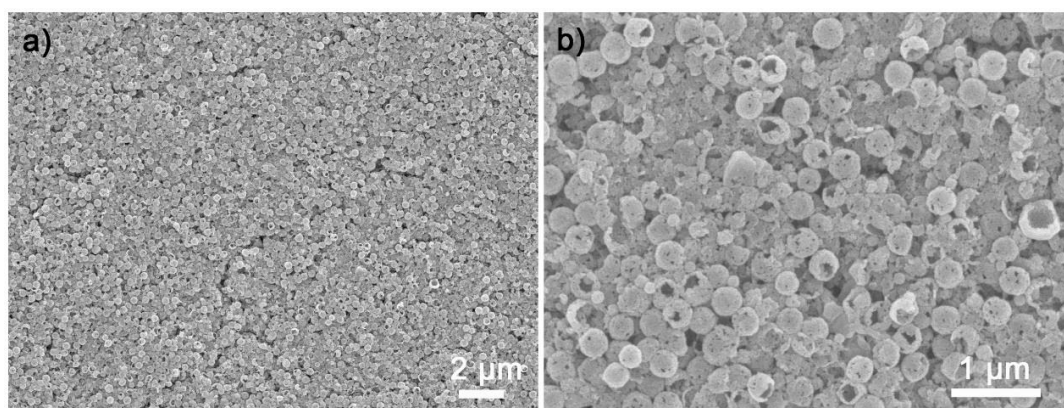

**Fig. S4** SEM image of Fe-MOF after etching by acid at 140 °C for 6 h

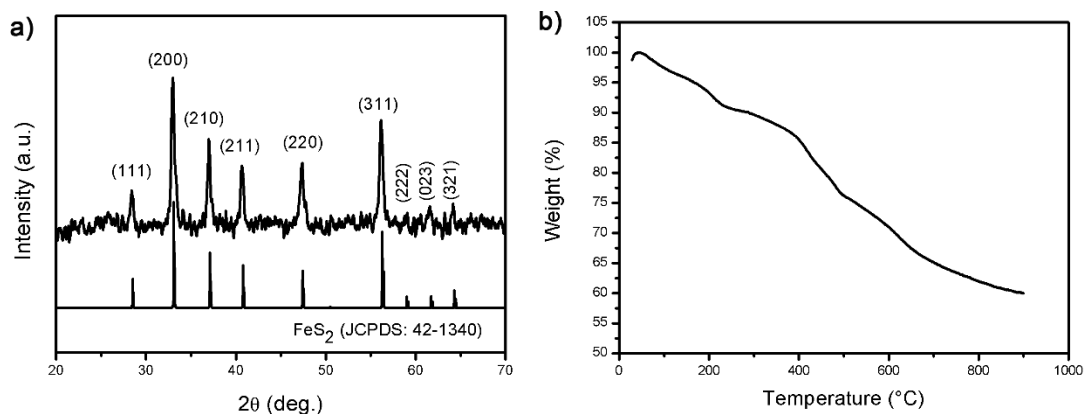

**Fig. S5** a) XRD pattern and b) TGA curve of FeS<sub>2</sub>@C. The TGA curve, which evaluates the weight of FeS<sub>2</sub> in FeS<sub>2</sub>@C, was measured over a temperature range from 30 °C to 900 °C in an atmosphere of air. It can be observed that the weight loss is around 40%. The weight loss is ascribed to two reactions: carbon to CO<sub>2</sub> (reaction 1) and FeS<sub>2</sub> oxidized to Fe<sub>3</sub>O<sub>4</sub> (reaction 2). Based on the weight loss in TGA result and following Eq. (S1) (where *M* indicates molecular weight, and *m* represents the mass of the samples), it can be calculated that the carbon weight is about 10 wt% in FeS<sub>2</sub>@C.

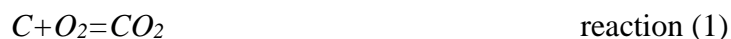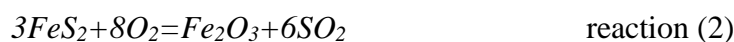

$$FeS_2(\text{wt}\%) = 100 \times (3M_{FeS_2} / M_{Fe_2O_3}) \times (m_{Fe_2O_3} / m_{FeS_2@C}) \quad (\text{S1})$$

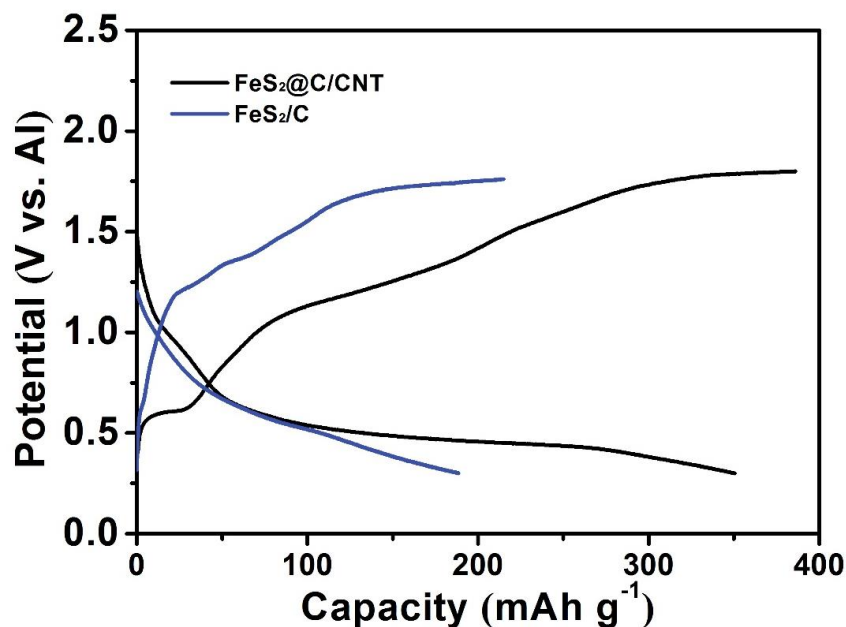

**Fig. S6** Initial discharge-charge curves of the FeS<sub>2</sub>@C/CNT and FeS<sub>2</sub>/C electrode

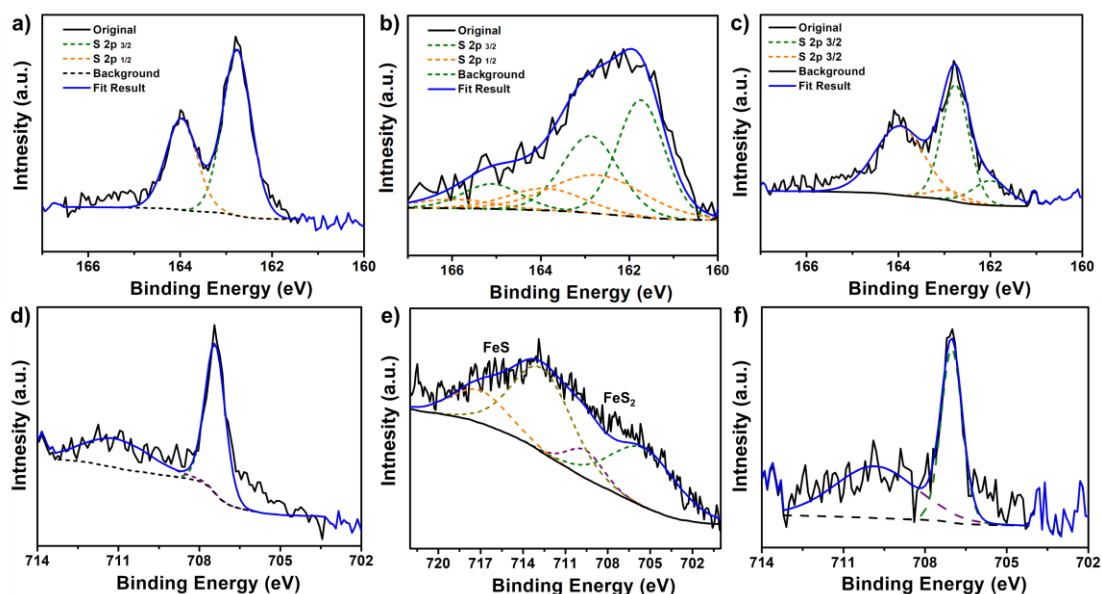

**Fig. S7** XPS spectra of S 2p of the FeS<sub>2</sub> electrode at **a**) pristine, **b**) discharged, and **c**) charged stage. XPS spectra of Fe 2p of FeS<sub>2</sub> electrode at **d**) pristine, **e**) discharged, and **f**) charged stage. After fully discharged, the peak shift to the lower binding energy with the peak around 160.5 eV, which is ascribed to the S<sup>2-</sup> in FeS. Meanwhile, there still existed remaining peaks contributed by S<sub>2</sub><sup>2-</sup> from FeS<sub>2</sub> due to the inactive materials in the cathode. After fully recharged, the peaks shifted back the higher binding energy ascribing to the S<sub>2</sub><sup>2-</sup> of FeS<sub>2</sub>, which further proved the proposed reaction. Regards to the Fe 2p spectra, the positive shift of the peaks confirmed the formation of the FeS after fully discharged. The recovery of the Fe 2p peak after fully recharged further proved the reversibility of the proposed reaction.

**Table S1** Simulation result of the involved materials during the discharge-charge process

|                                  | a/Å      | b/Å      | c/Å      | α/degrees | β/v | γ/ degrees | V/Å <sup>3</sup> |
|----------------------------------|----------|----------|----------|-----------|-----|------------|------------------|
| Fe <sub>4</sub> S <sub>8</sub>   | 5.405215 | 5.405215 | 5.405215 | 90        | 90  | 90         | 157.921          |
| Fe <sub>12</sub> S <sub>12</sub> | 6.019331 | 6.019331 | 11.16354 | 90        | 90  | 120        | 350.291          |
| Al <sub>12</sub> S <sub>18</sub> | 6.610146 | 6.610146 | 17.28143 | 90        | 90  | 120        | 653.932          |

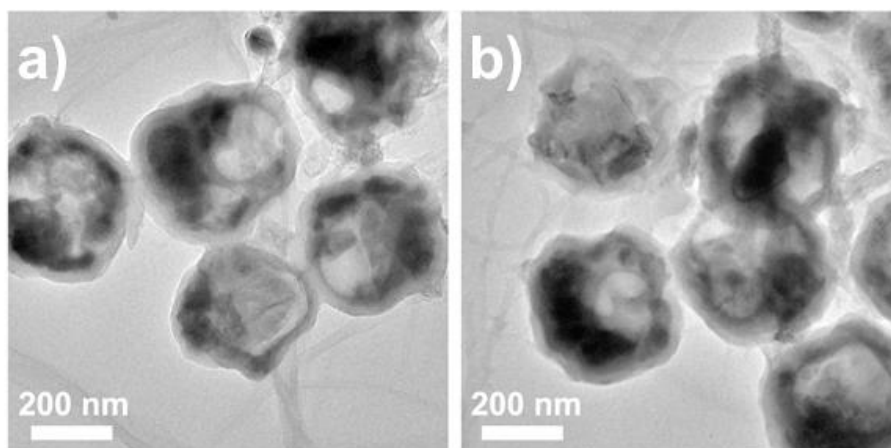

**Fig. S8** a) and b) TEM image of FeS<sub>2</sub>@C/CNT electrode after 50<sup>th</sup> and 200<sup>th</sup> cycles, respectively

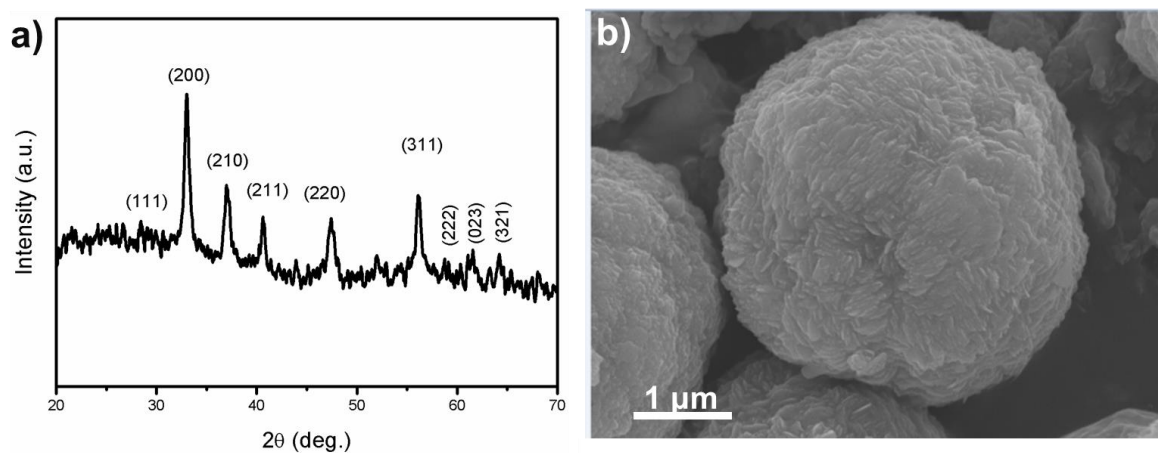

**Fig. S9** a) XRD and b) SEM image of micro-sphere FeS<sub>2</sub> bulk, respectively

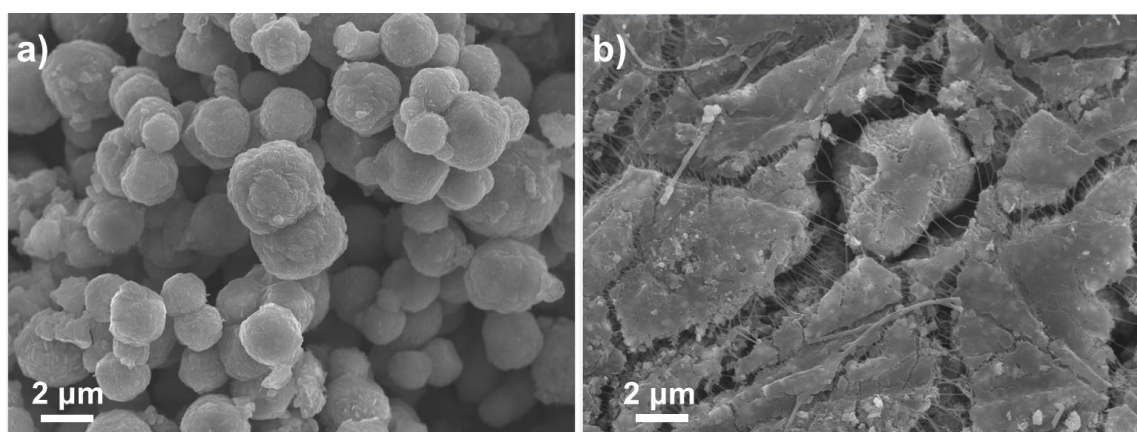

**Fig. S10** SEM image of the micro-sphere FeS<sub>2</sub> a) before cycled and b) after cycled for 50 times

**Table S2** Simulation result of the adsorption energy of the FeS<sub>2</sub> and FeS<sub>2</sub>/N-C models

|                     | FeS <sub>2</sub> /N-C | FeS <sub>2</sub> |
|---------------------|-----------------------|------------------|
| $E_{base}$          | -798.492              | -369.06          |
| $E_{Al}$            | -0.197                | -0.197           |
| $E_{base} + E_{Al}$ | -800.446              | -370.668         |
| $\Delta E$          | -1.755                | -1.406           |

The hydrogen and water adsorption energy on various surfaces is defined as Eq. (S2):

$$\Delta E_{ads} = E_{base-Al} - E_{base} - E_{Al} \quad (S2)$$

where  $E_{base-Al}$  is the total energy of the slab model with Al adsorption,  $E_{base}$  is the energy of a clean slab surface, and  $E_{Al}$  is that for Al species.

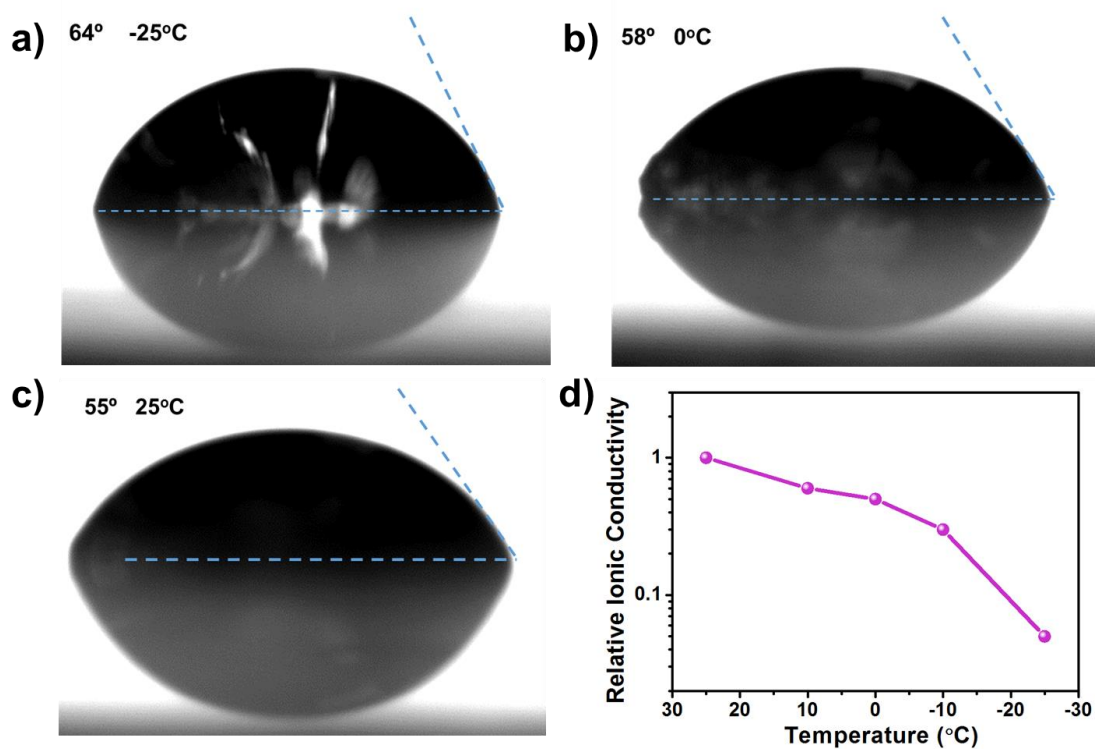

**Fig. S11** Contact angle of the IL under a) -25°C, b) 0 °C, and c) 25 °C. d) the relative ionic conductivity of the IL electrolyte under various temperatures

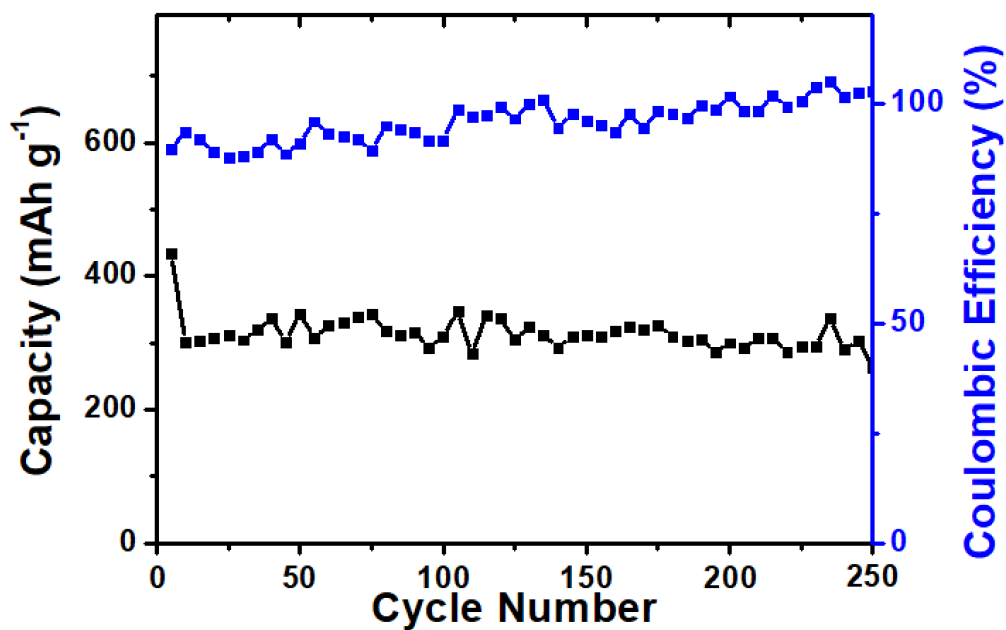

**Fig. S12** Cycling stability of the FeS<sub>2</sub>@C/CNT at a high temperature of 50 °C. Although previous literature reported the inferior cycling stability of batteries at high temperature, the FeS<sub>2</sub>@C/CNT maintained stable capacity and coulombic efficiency at 50 °C, which was ascribed to the void yolk-shell structure and well-protected carbon layer. Meanwhile, the interaction between FeS<sub>2</sub> and N-doped carbon was discussed in the simulation part.
